# Supplementary material for: Transverse sinus injections drive robust whole-brain expression of transgenes
Source: eLife. 2020 May 18;9:e53639. doi: 10.7554/eLife.53639 (PMC7266618; doi:10.7554/eLife.53639)
Supplement: Figure 1—source data 1. — Percent cortical neurons labeled using AAV9 n-SIM, AAV1 n-SIM, AAV5 n-SIM, AAV-PHP.eB n-SIM, AAV9 ICV, AAV9 temporal vein. Mouse pup ages range from P6-P21, and injections were performed at P1. [file elife-53639-fig1-data1.xlsx]

## Sheet: Sheet1
	% Cortical neuron labeling
	AAV9 temporal vein		AAV5 n-SIM		AAV-PHP.eB		AAV1 n-SIM		AAV9 ICV		AAV9 n-SIM
	mouse #1 (P6)	2.1	mouse #1 (P6)	10.11	mouse #1 (P14)	10	mouse #1 (P6)	7.5	mouse #1 (P6)	42.79	mouse #1 (P6)	44.95
	mouse #2 (P6)	10	mouse #2 (P6)	3.1	mouse #2 (P14)	5	mouse #2 (P6)	40.9	mouse #2 (P6)	31.52	mouse #2 (P6)	40.64
	mouse #3 (P21)	17.2	mouse #3 (P14)	2	mouse #3 (P21)	5.22	mouse #3 (P21)	32.8	mouse #3 (P9)	48.77	mouse #3 (P6)	45.86
	mouse #4 (P21)	5.1	mouse #4 (P14)	1	mouse #4 (P21)	2	mouse #4 (P21)	52	mouse #4 (P9)	44.39	mouse #4 (P6)	69.07
									mouse #5 (P9)	29.71	mouse #5 (P6)	60.32
									mouse #6 (P16)	43.83	mouse #6 (P14)	54.21
									mouse #7 (P16)	49.9	mouse #7 (P14)	59.63
									mouse #8 (P16)	31.62	mouse #8 (P14)	56.18
									mouse #9 (P16)	24	mouse #9 (P14)	26.88
									mouse #10 (P16)	25.78	mouse #10 (P14)	62.81
Mean		8.6		4.0525		5.555		33.3		37.23		52.055
Standard Deviation		6.59343		4.1284		3.30738		18.9151		9.69		12.4965
SEM		3.29672		2.0642		1.65369		9.45754		3.06		3.9521
