# Supplementary material for: Transverse sinus injections drive robust whole-brain expression of transgenes
Source: eLife. 2020 May 18;9:e53639. doi: 10.7554/eLife.53639 (PMC7266618; doi:10.7554/eLife.53639)
Supplement: Figure 1—source data 2. — Quantification of neuronal labeling in various cortical and subcortical regions at postnatal day 14 (P14). [file elife-53639-fig1-data2.xlsx]

## Sheet: Sheet1
P14
	mouse #1	mouse #2	mouse #4	mouse #5	mouse #6	mouse #7		Mean	Standard Deviation	n	SEM
M1	42.26	58.57	43.2194	26.8843	66.3313			47.45	15.3944	5	6.8846
V1	62.5	57.95	60.3618		70.7895			62.9	5.57679	4	2.7884
S1		69.23	52.3521		61.4299			61	8.44736	3	4.87709
A1	63.03	53.21						58.12	6.94948	2	4.91402
Retrosplenial	54.78	61.11						57.94	4.47884	2	3.16702
Piriform	46.84	59.38			24.8985			43.7	17.4504	3	10.075
DLG	54.02	50.96						52.49	2.16477	2	1.53073
Anterodorsal thal.	60.26				76.383			60.26	0	2	0
Hippocampus		28.94	26.4444		46.9251			34.1	11.1745	3	6.45161
Striatum		28.34		4.99533				16.67	16.5088	2	11.6735
SC					64.3293	68.3		66.3146	2.80773	2	1.98537
