# Supplementary material for: Transverse sinus injections drive robust whole-brain expression of transgenes
Source: eLife. 2020 May 18;9:e53639. doi: 10.7554/eLife.53639 (PMC7266618; doi:10.7554/eLife.53639)
Supplement: Figure 1—source data 3. — Quantification of neuronal labeling from each cortical layer at P14. [file elife-53639-fig1-data3.xlsx]

## Sheet: Sheet1
P14
	mouse #1	mouse #2	mouse #3	mouse #4	mouse #5
Layer 2/3	71.3	70.23	35.77	46.28	38.97
Layer 4	60.16	72.28	44.23	62.73	80.07
Layer 5	42.86	57.05	63.92	65.68	75.82
Layer 6	70.37	54.81	36.43	74.5	48.01
