# Supplementary material for: Transverse sinus injections drive robust whole-brain expression of transgenes
Source: eLife. 2020 May 18;9:e53639. doi: 10.7554/eLife.53639 (PMC7266618; doi:10.7554/eLife.53639)
Supplement: Figure 1—source data 4. — Percent cortical and thalamic neuron labeling at P6, P9, P14, P45 after P1 n-SIM, and P14 after P4 n-SIM. [file elife-53639-fig1-data4.xlsx]

## Sheet: Sheet1
P6 AAV9 n-SIM at P1			P9 AAV9 n-SIM at P1			P14 AAV9 n-SIM at P1			P45 AAV9 n-SIM at P1			P14 AAV9 n-SIM at P4
	cortex	thalamus		cortex	thalamus		cortex	thalamus		cortex	thalamus		cortex	thalamus
mouse #1	44.95		mouse #1	45.71	53.33	mouse #1	54.21	54.02	mouse #1	61.49	100	mouse #1	30.12	7.5
mouse #2	40.64		mouse #2	54.86	46.15	mouse #2	59.63	50.96	mouse #2	71.79	70	mouse #2	19.96	8.05
mouse #3	45.86	78.3				mouse #3	56.18	62	mouse #3	54.1
mouse #4	69.07					mouse #4	26.88		mouse #4	97.09
mouse #5	60.32	54.51				mouse #5	62.64	52.82	mouse #5	65.18
