# Supplementary material for: Transverse sinus injections drive robust whole-brain expression of transgenes
Source: eLife. 2020 May 18;9:e53639. doi: 10.7554/eLife.53639 (PMC7266618; doi:10.7554/eLife.53639)
Supplement: Figure 4—source data 1. — Percent neuronal labeling in various cortical regions, in addition to the thalamus and hippocampus. Rat brains were quantified at P6 and P9 after P1 n-SIM. [file elife-53639-fig4-data1.xlsx]

## Sheet: Sheet1
	rat #1 (P6)	rat #2 (P6)	rat #3 (P6)	rat #4 (P9)		Mean	Standard Deviation	n	SEM
M1	22.7597	34.1855	57.8571	29.7701		36.1431	15.2213	4	7.61065
S1	13.242	47.8873		39.0625		33.3973	18.004	3	10.3946
V1	14.2857	42.1015	59.3839	25.6275		35.3496	19.676	4	9.83802
RSA	24.1573	45.6731	61.1765	19.7531		37.69	19.3237	4	9.66183
Thalamus	33.3333	38.8633	55.7782	32.619		40.1485	10.787	4	5.39351
Hippocampus	18.0851	17.0666	73.01	12.766		30.2319	28.6117	4	14.3059
