# Supplementary material for: Transverse sinus injections drive robust whole-brain expression of transgenes
Source: eLife. 2020 May 18;9:e53639. doi: 10.7554/eLife.53639 (PMC7266618; doi:10.7554/eLife.53639)
Supplement: Figure 5—source data 1. — Percent neuronal labeling in various cortical regions, in addition to thalamus and hippocampus. Mouse brains were quantified at P6, P9, and P16. ICV injections were performed at P0. [file elife-53639-fig5-data1.xlsx]

## Sheet: Sheet1
	mouse #1 (P6)	mouse #2 (P6)	mouse #3 (P9)	mouse #4 (P9)	mouse #5 (P9)	mouse #6 (P16)	mouse #7 (P16)	mouse #8 (P16)	mouse #9 (P16)	mouse #10 (P16)		Mean	Standard Deviation	n	SEM
M1	39.3939	35.1351	37.7049	30.1587	25.1969		44.0678	32.2917	22.7642	25.7812		32.4994	7.19517	9	2.39839
S1	68.0328	46.1832	65.9193	54.8077	23.4783	35.2941	52.8926	40.3727				48.3726	15.1931	8	5.37158
V1	20.9677	13.2653	42.7027	48.2143	40.4762	52.3809	52.7397	22.2222	25.2427			35.3569	15.0307	10	4.75311
Thalamus	31.8841	7.48663	11.9048	44.4444	32.0611	2.89855	10.2273	10.2941				18.9001	15.0183	8	5.30976
Hippocampus	36.7347	65.2174	75.6757	40.2985			34.1772	56.0976				51.3668	16.9542	6	6.92153
