# Supplementary material for: Transverse sinus injections drive robust whole-brain expression of transgenes
Source: eLife. 2020 May 18;9:e53639. doi: 10.7554/eLife.53639 (PMC7266618; doi:10.7554/eLife.53639)
Supplement: Figure 5—source data 2. — Percent Nkx2.1 and non-Nkx2.1 neuron labeling at P7-P14 using n-SIM and ICV. [file elife-53639-fig5-data2.xlsx]

## Sheet: Sheet1
	ICV			n-SIM
	Nkx	Non-Nkx		Nkx	Non-Nkx
mouse #1 (P7)	7.33	17.69	mouse #1 (P7)	33.33	26.05
mouse #2 (P7)	6.73	34.43	mouse #2 (P7)	6.74	23.72
			mouse #3 (P7)	8.45	43.07
			mouse #4 (P14)	20	29.38
			mouse #5 (P14)	31.42	29.22
